# Supplementary material for: Total Release of 21 Indicator Pharmaceuticals Listed by the Swedish Medical Products Agency from Wastewater Treatment Plants to Surface Water Bodies in the 1.3 Million Populated County Skåne (Scania), Sweden
Source: MDPI journal article supplement (doi:10.3390/molecules27010077), 2021-12-23
Supplement: s1 [file s1]

Supplementary Materials

# Total Release of 21 Indicator Pharmaceuticals Listed by the Swedish Medical Products Agency from Wastewater Treatment Plants to Surface Water Bodies in the 1.3 Million Populated County Skåne (Scania), Sweden

Erland Björklund \* and Ola Svahn \*

Department of Environmental Science and Bioscience, Kristianstad University, Elmetorpsvägen 15, SE-291 88, Kristianstad, Sweden

\* Correspondence: erland.bjorklund@hkr.se (E.B.); ola.svahn@hkr.se (O.S.)

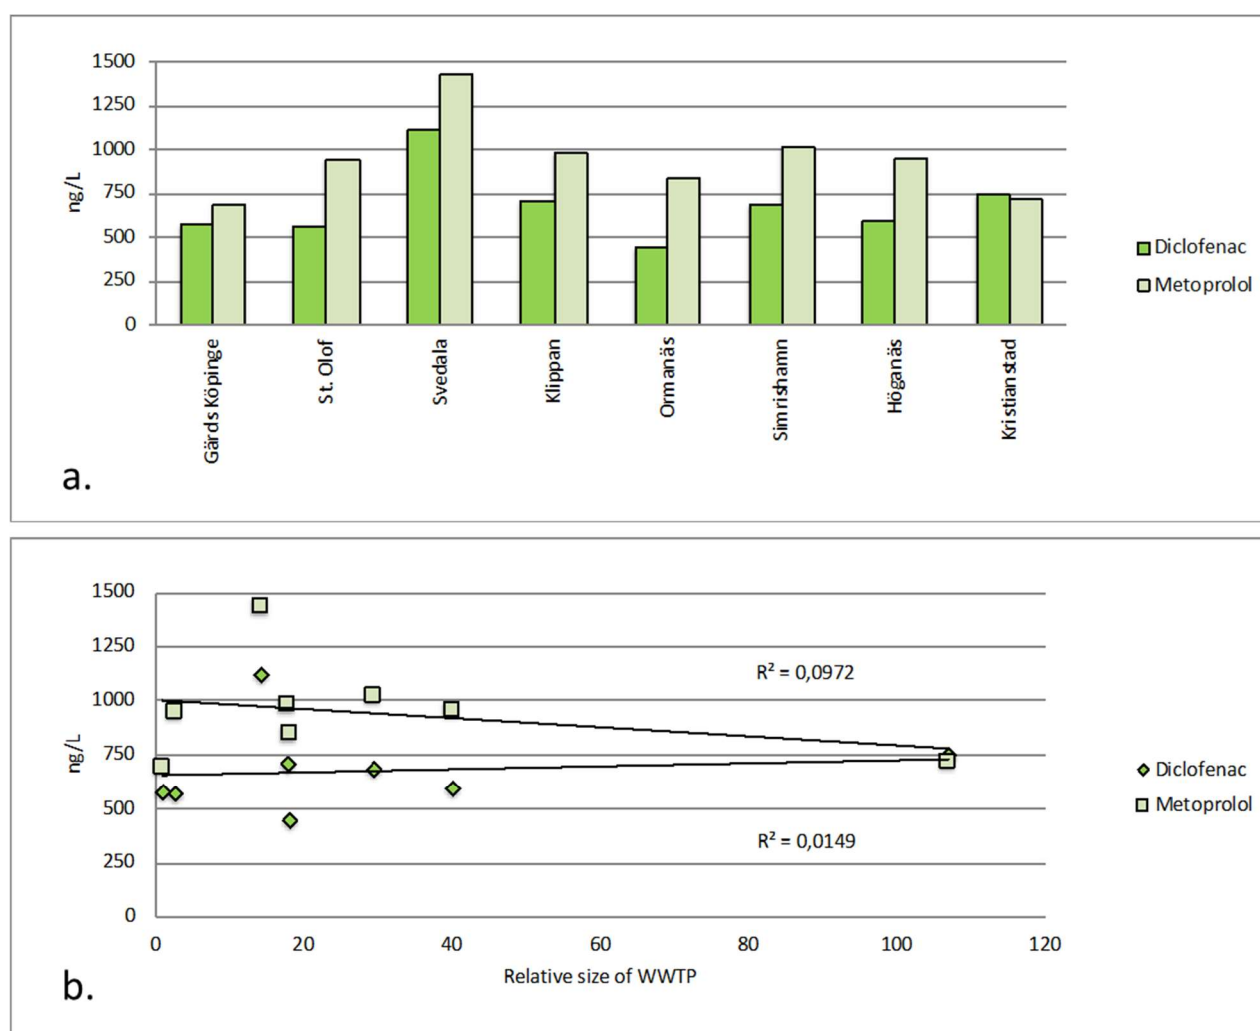

**Figure S1.** Outlet concentrations of diclofenac and metoprolol.

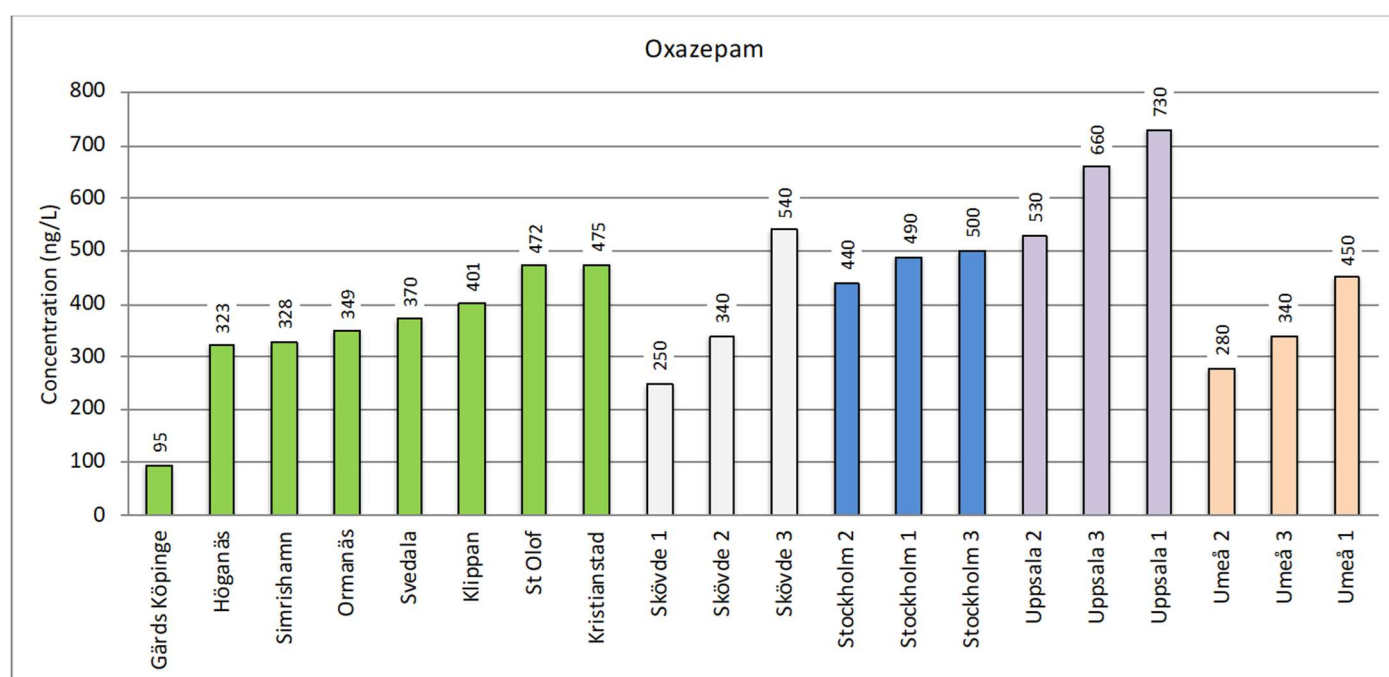

Figure S2. Outlet concentrations of oxazepam.

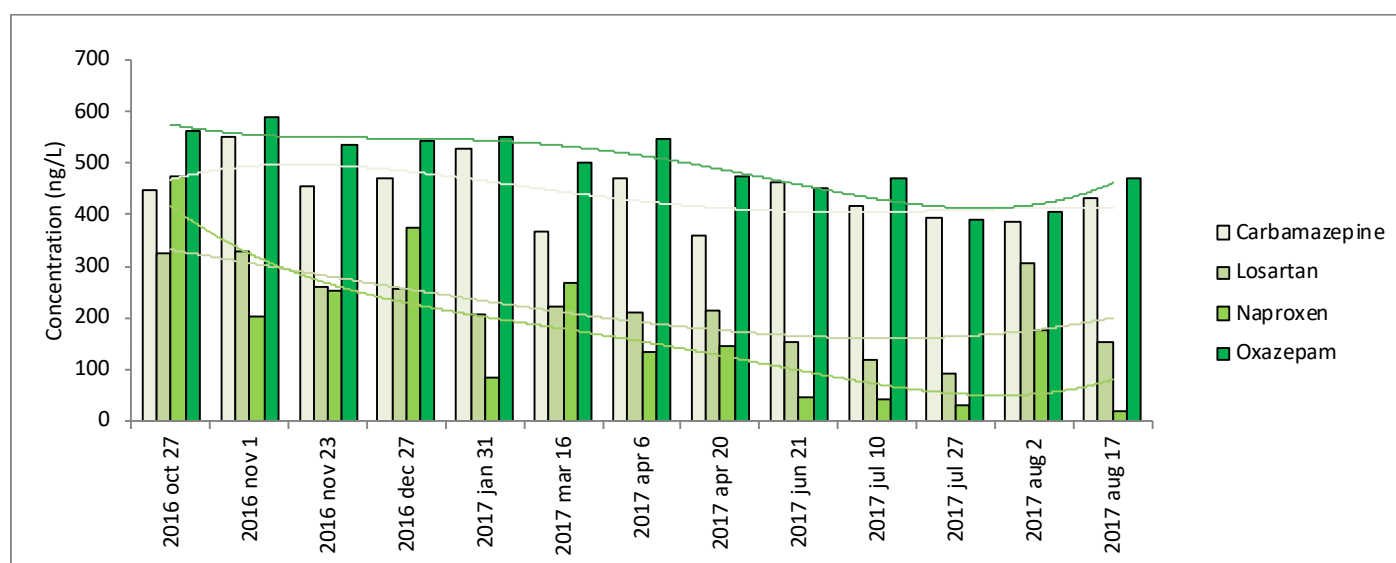

Figure S3. Seasonal concentrations of 4 pharmaceuticals at Kristianstad WWTP.

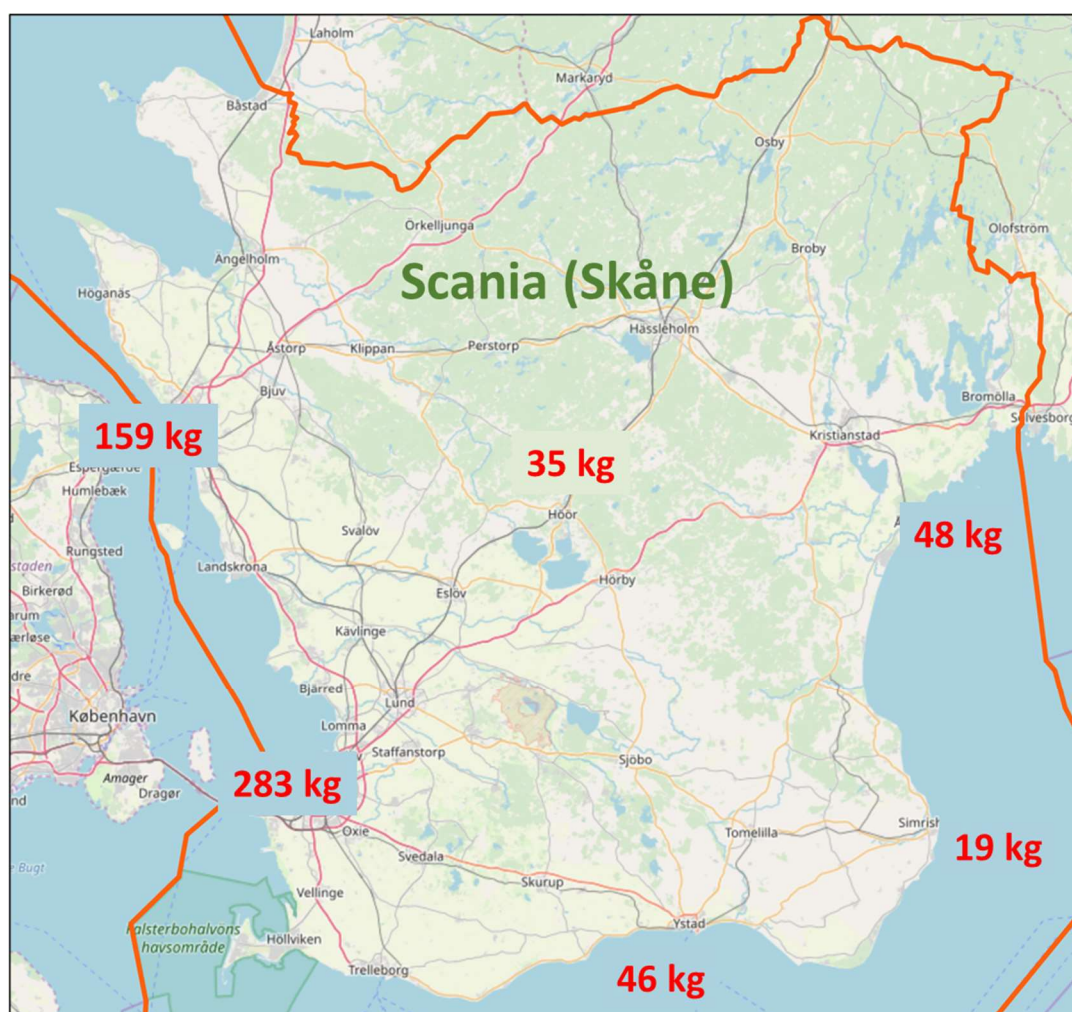

Figure S4. Estimated release of pharmaceuticals in kg.

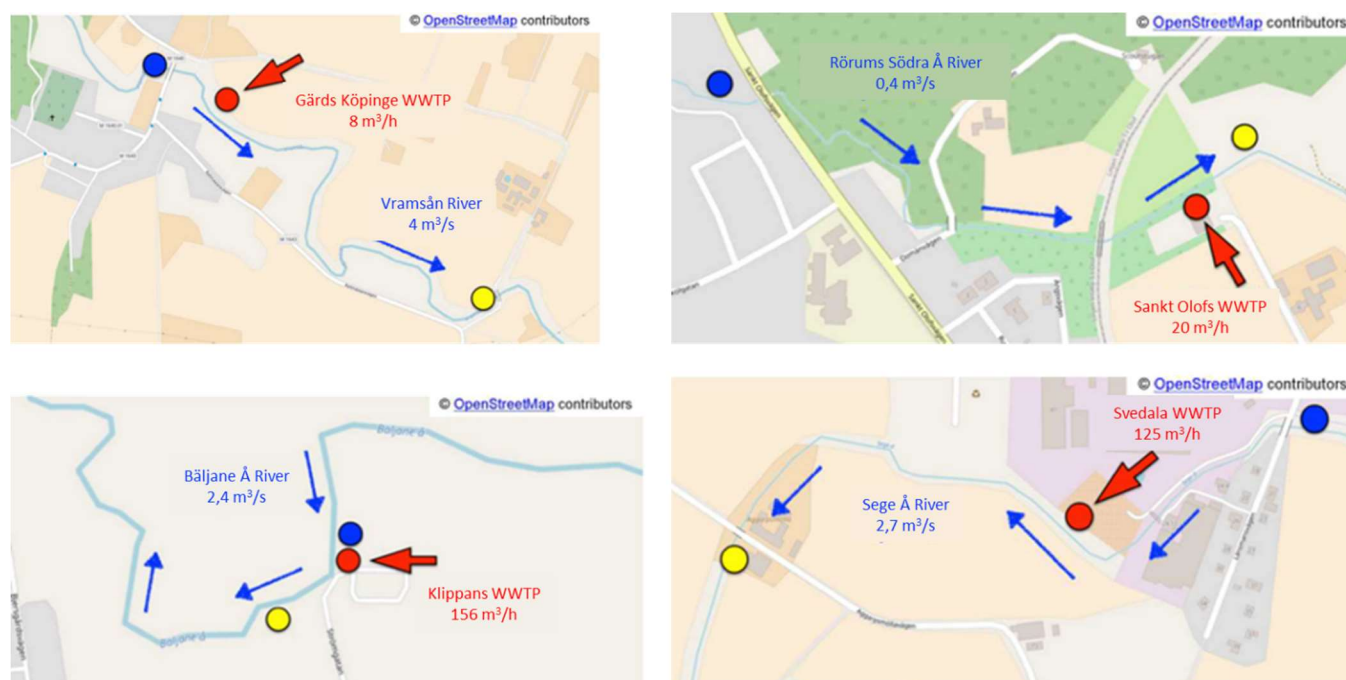

Figure S5. River sampling points.

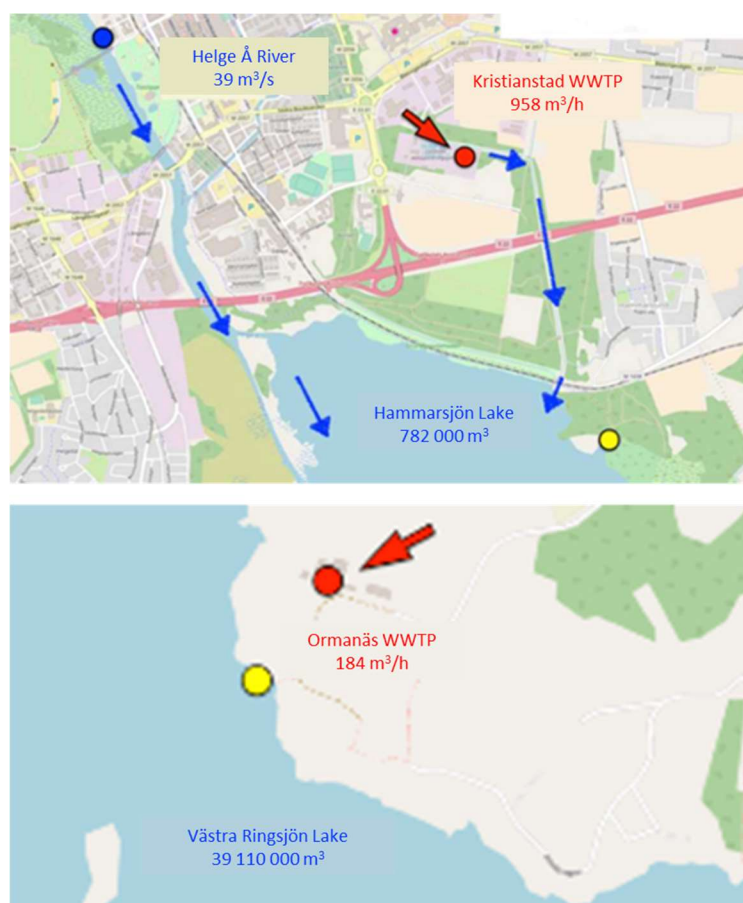

Figure S6. Lake sampling points.

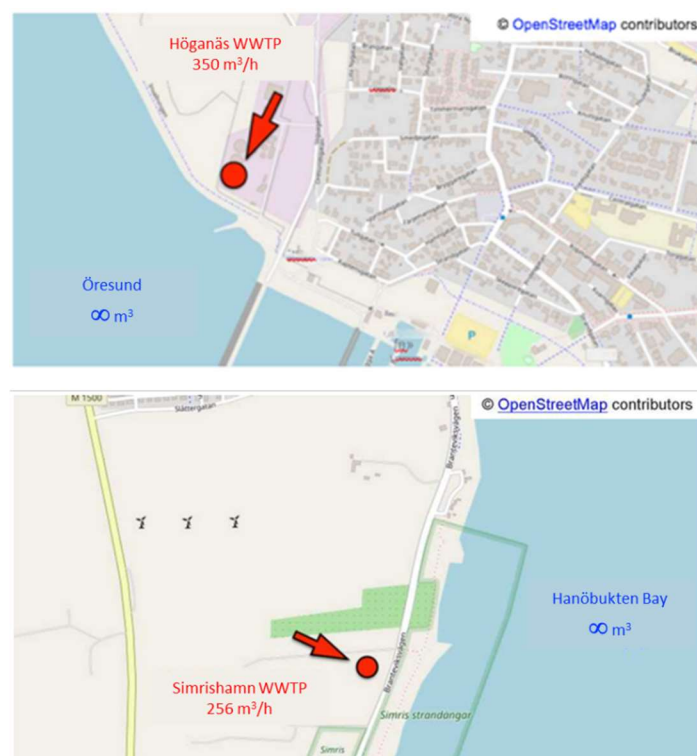

Figure S7. WWTPs by the coast.

Table S1.a. Information about the 8 WWTPs.

| WWTP          | Annual Volume m <sup>3</sup> | Year | Average Hourly Flow m <sup>3</sup> /h | Max. Dimension PE | Actual Number PE | Residents Connected PE | Industry Connected PE | Other Activities PE | Recipient             |
|---------------|------------------------------|------|---------------------------------------|-------------------|------------------|------------------------|-----------------------|---------------------|-----------------------|
| Gärds Köpinge | 76 538                       | 2016 | 8.75                                  | 900               | 425              | ?                      | 0                     | 0                   | Vramsån river         |
| Höganäs       | 3 075 792                    | 2016 | 350                                   | 35 000            | 20 257           | 23 033                 | 200                   | 0                   | Öresund sea           |
| Klippan       | 1 366 560                    | 2016 | 156                                   | 17 000            | 8 600            | 13 000                 | 0                     | 0                   | Bäljane Å river       |
| Kristianstad  | 8 186 000                    | 2016 | 958                                   | 205 000           | 118 300          | 52 000                 | 64 000                | ?                   | Hammar sjön lake      |
| Ormanäs       | 1 388 399                    | 2016 | 184                                   | 13 500            | 3 782            | 9 000                  | ?                     | 2 681               | Västra Ringsjön lake  |
| Simrishamn    | 2 250 000                    | ?    | 256                                   | ?                 | 87 000           | 23 000                 | 6 740                 | ?                   | Hanöbukten Baltic sea |
| Sankt Olof    | 200 000                      | ?    | ?                                     | 1 000             | 600              | ?                      | ?                     | ?                   | Rörums Södra Å river  |
| Svedala       | 1 100 164                    | 2016 | 125                                   | 18 500            | 9 800            | 12 000                 | ?                     | Sturup air-port     | Sege Å river          |

Operating parameters according to the responses returned by the participating organisations in the completed questionnaires. The value of zero ("0") means that the organisations stated this value, while the question marks ("??") mean that no value was given or that uncertainty exists.

Table S1.b. Complementary information about the eight WWTPs.

| WWTP                     | Step 1                                | Step 2                                                         | Step 3                                                                        | Step 4                                                        | Step 5                                                | Step 6                                                                                                    | Step 7                    |
|--------------------------|---------------------------------------|----------------------------------------------------------------|-------------------------------------------------------------------------------|---------------------------------------------------------------|-------------------------------------------------------|-----------------------------------------------------------------------------------------------------------|---------------------------|
| <b>Simrishamn</b>        | Mechanical, Cleaning grate, sand trap | Chemical precipitation                                         | Biological Anox/contact tanks                                                 | Reed beds                                                     | Final sedimentation                                   |                                                                                                           |                           |
| <b>Svedala</b>           | Inlet pumps/<br>grating/<br>sand trap | 2 x biolines with<br>pre-denitrification                       | Intermediate<br>sedimentation                                                 | Ferric chloride dosing                                        | Final sedimentation                                   | Sludge layer, gravitation thickener, centrifuge, liming of sludge (reserve sludge treatment is reed beds) |                           |
| <b>Ormanäs</b>           | Mono-screen<br>grating                | Preliminary sedimentation                                      | Activated sludge/<br>Pre-denitrification<br>/Anox                             | Intermediate<br>sedimentation                                 | Chemical<br>stage/precipitation<br>PAX-XL 100         | Flotation tanks                                                                                           | Sand filter               |
| <b>Klippan</b>           | Stair grating                         | Preliminary sedimentation                                      | Activated sludge/<br>Pre-denitrification                                      | Simultaneous<br>precipitation with<br>iron sulphate           |                                                       | Sedimentation                                                                                             |                           |
| <b>Höganäs</b>           | Step screen                           | Preliminary sedimentation                                      | Activated sludge process/<br>Pre-denitrification/<br>bio-p                    | Post precipitation with polyaluminium chloride, sedimentation | Downstream<br>sand filter                             |                                                                                                           |                           |
| <b>Gärds<br/>Köpinge</b> | Mechanical cleaning:<br>Spiral screen | Activated sludge/<br>Aeration (pipe aerator)/<br>Sedimentation | Chemical precipitation<br>with FeCl <sub>3</sub> /Flocking                    | Sedimentation                                                 |                                                       |                                                                                                           |                           |
| <b>Kristianstad</b>      | Stair grating                         | Sedimentation                                                  | Activated sludge/<br>Pre-denitrification/<br>Krauss process/<br>Sedimentation | Activated sludge/<br>Pre-denitrification/<br>Sedimentation    | Precipitation with<br>FeCl <sub>3</sub> /<br>Flocking | Slat<br>sedimentation                                                                                     | Downstream<br>sand filter |

Operating parameters according to the responses returned by the participating organisations in the completed questionnaires.



Table S2. WWTP outlet concentrations.

| Pharmaceutical | LOQ (ng/L) | Gärds Köpinge WWTP | Höganäs WWTP | Klippan WWTP | Kristianstad WWTP | Ormanäs WWTP | Simrishamn WWTP | Sankt Olof WWTP | Svedala WWTP | Average Concentration | Standard Deviation | RSD (%) |
|----------------|------------|--------------------|--------------|--------------|-------------------|--------------|-----------------|-----------------|--------------|-----------------------|--------------------|---------|
| Ciprofloxacin  | 10         | <LOQ               | <LOQ         | <LOQ         | <LOQ              | <LOQ         | <LOQ            | <LOQ            | <LOQ         | <LOQ                  |                    |         |
| Citalopram     | 1          | 120                | 93           | 135          | 80                | 164          | 110             | 104             | 217          | 128                   | 44                 | 35      |
| Clarithromycin | 2          | <LOQ               | 56           | 101          | 24                | 82           | 29              | 3               | 213          | 64                    | 70                 | 111     |
| Diclofenac     | 2          | 579                | 594          | 707          | 746               | 442          | 685             | 569             | 1117         | 680                   | 201                | 30      |
| Erythromycin   | 0.5        | 1                  | 53           | 166          | 215               | 12           | 113             | 3               | 640          | 150                   | 213                | 142     |
| Estrone        | 0.2        | 18                 | 1            | 1            | 3                 | 63           | 7               | 4               | 7            | 13                    | 21                 | 161     |
| Fluconazole    | 0.3        | 3                  | 59           | 52           | 105               | 71           | 24              | 17              | 53           | 48                    | 33                 | 68      |
| Ibuprofen      | 100        | <LOQ               | <LOQ         | 92           | <LOQ              | 1158         | 613             | 124             | 107          | 262                   | 415                | 158     |
| Carbamazepine  | 0.5        | 139                | 442          | 439          | 470               | 529          | 233             | 601             | 699          | 444                   | 183                | 41      |
| Ketoconazole   | 15         | <LOQ               | <LOQ         | <LOQ         | <LOQ              | <LOQ         | <LOQ            | <LOQ            | <LOQ         | <LOQ                  |                    |         |
| Levonorgestrel | 10         | <LOQ               | <LOQ         | <LOQ         | <LOQ              | <LOQ         | <LOQ            | <LOQ            | <LOQ         | <LOQ                  |                    |         |
| Losartan       | 1          | 386                | 344          | 274          | 217               | 83           | 673             | 497             | 921          | 424                   | 268                | 63      |
| Metoprolol     | 2          | 692                | 954          | 979          | 714               | 843          | 1016            | 943             | 1430         | 946                   | 230                | 24      |
| Methotrexate   | 2          | <LOQ               | <LOQ         | <LOQ         | <LOQ              | <LOQ         | <LOQ            | <LOQ            | <LOQ         | <LOQ                  |                    |         |
| Naproxen       | 10         | 145                | 378          | 290          | 119               | 266          | 379             | 1430            | 304          | 414                   | 421                | 102     |
| Oxazepam       | 1          | 95                 | 323          | 401          | 475               | 349          | 328             | 472             | 370          | 352                   | 119                | 34      |
| Sertraline     | 1          | 19                 | 18           | 40           | 4                 | 47           | 8               | 27              | 32           | 24                    | 15                 | 62      |

|                  |     |      |     |     |     |     |    |      |     |     |     |    |
|------------------|-----|------|-----|-----|-----|-----|----|------|-----|-----|-----|----|
| Sulfamethoxazole | 2   | <LOQ | 238 | 118 | 208 | 173 | 51 | <LOQ | 281 | 134 | 109 | 81 |
| Tramadol         | 10  | 190  | 145 | 187 | 208 | 118 | 81 | 94   | 151 | 147 | 47  | 32 |
| Trimethoprim     | 1   | 6    | 95  | 78  | 29  | 64  | 33 | 1    | 107 | 52  | 40  | 78 |
| Zolpidem         | 0.5 | 3    | 3   | 2   | 3   | 1   | 1  | 2    | 4   | 2   | 1   | 45 |

Outlet concentrations in **ng/L** of 21 pharmaceuticals from eight Scanian wastewater treatment plants (WWTPs). **BLUE** values indicate the treatment plant with the lowest outlet concentration, while **RED** values indicate the treatment plant with the highest outlet concentration of the respective substance. **ORANGE** cells indicate antibiotics.

**Table S3.** Seasonal concentrations at Kristianstad WWTP.

| Pharmaceuti-<br>cal | 2016<br>Oct 27 | 2016<br>Nov 1 | 2016<br>Nov 23 | 2016<br>Dec 27 | 2017<br>Jan 31 | 2017<br>Mar 16 | 2017<br>Apr 6 | 2017<br>Apr 20 | 2017<br>Jun 21 | 2017<br>Jul 10 | 2017<br>Jul 27 | 2017<br>Aug 2 | 2017<br>Aug 17 | Average<br>Concentra-<br>tion | Stand-<br>ard<br>Devia-<br>tion | RSD<br>(%) |
|---------------------|----------------|---------------|----------------|----------------|----------------|----------------|---------------|----------------|----------------|----------------|----------------|---------------|----------------|-------------------------------|---------------------------------|------------|
| Metoprolol          | 774            | 724           | 659            | 855            | 892            | 684            | 691           | 616            | 481            | 421            | 541            | 478           | 481            | 638                           | 145                             | 23         |
| Diclofenac          | 658            | 781           | 781            | 836            | 898            | 770            | 789           | 622            | 515            | 407            | 359            | 614           | 485            | 655                           | 165                             | 25         |
| Carbamaze-<br>pine  | 447            | 552           | 454            | 470            | 529            | 367            | 472           | 360            | 461            | 417            | 395            | 385           | 431            | 441                           | 56                              | 13         |
| Losartan            | 326            | 330           | 261            | 256            | 207            | 221            | 212           | 213            | 153            | 119            | 91             | 306           | 153            | 219                           | 73                              | 33         |
| Naproxen            | 476            | 204           | 253            | 376            | 85             | 269            | 132           | 144            | 44             | 41             | 32             | 177           | 20             | 173                           | 135                             | 78         |
| Oxazepam            | 561            | 589           | 535            | 544            | 551            | 501            | 549           | 474            | 451            | 471            | 389            | 406           | 472            | 499                           | 59                              | 12         |

Measured concentrations in ng/L of 6 pharmaceuticals in outlet water from Kristianstad WWTP at different seasons in 2016-2017.



Table S4. Outlet masses from WWTPs.

| Pharmaceutical   | Gärds Kö-pinge | Sankt Olof | Svedala | Klippan | Or-manäs | Simri-shamn | Höganäs | Kristian-stad | Total (g/year) |
|------------------|----------------|------------|---------|---------|----------|-------------|---------|---------------|----------------|
| Ciprofloxacin    | 0              | 0          | 0       | 0       | 0        | 0           | 0       | 0             | 0              |
| Citalopram       | 9              | 21         | 239     | 185     | 227      | 247         | 286     | 659           | 1873           |
| Clarithromycin   | 0              | 1          | 235     | 139     | 113      | 64          | 172     | 196           | 920            |
| Diclofenac       | 44             | 114        | 1228    | 966     | 613      | 1541        | 1827    | 6107          | 12440          |
| Erythromycin     | 0              | 1          | 704     | 227     | 17       | 254         | 162     | 1761          | 3127           |
| Estrone          | 1              | 1          | 7       | 1       | 88       | 16          | 4       | 20            | 138            |
| Fluconazole      | 0              | 3          | 59      | 71      | 98       | 55          | 182     | 860           | 1328           |
| Ibuprofen        | 0              | 25         | 117     | 125     | 1608     | 1380        | 0       | 0             | 3255           |
| Carbamazepine    | 11             | 120        | 769     | 600     | 735      | 525         | 1361    | 3844          | 7964           |
| Ketoconazole     | 0              | 0          | 0       | 0       | 0        | 0           | 0       | 0             | 0              |
| Levonorgestrel   | 0              | 0          | 0       | 0       | 0        | 0           | 0       | 0             | 0              |
| Losartan         | 30             | 99         | 1013    | 374     | 116      | 1513        | 1058    | 1772          | 5975           |
| Metoprolol       | 53             | 189        | 1573    | 1338    | 1171     | 2286        | 2935    | 5847          | 15392          |
| Methotrexate     | 0              | 0          | 0       | 0       | 0        | 0           | 0       | 0             | 0              |
| Naproxen         | 11             | 286        | 334     | 397     | 370      | 852         | 1162    | 976           | 4389           |
| Oxazepam         | 7              | 94         | 407     | 548     | 484      | 737         | 993     | 3888          | 7159           |
| Sertraline       | 1              | 5          | 36      | 54      | 66       | 19          | 55      | 31            | 267            |
| Sulfamethoxazole | 0              | 0          | 309     | 162     | 240      | 115         | 732     | 1704          | 3261           |
| Tramadol         | 15             | 19         | 167     | 256     | 163      | 183         | 444     | 1704          | 2950           |
| Trimethoprim     | 0              | 0          | 118     | 106     | 89       | 74          | 293     | 241           | 921            |
| Zolpidem         | 0              | 0          | 5       | 3       | 1        | 3           | 9       | 29            | 50             |
| Total (g)        | 184            | 980        | 7328    | 5558    | 6206     | 9868        | 11681   | 29638         | 71442          |
| Total (kg)       | 0.2            | 1.0        | 7.3     | 5.6     | 6.2      | 9.9         | 11.7    | 29.6          | 71.4           |

Outlet masses in grams of 21 pharmaceuticals from eight Scanian wastewater treatment plants (listed in size). **ORANGE** cells indicate antibiotics.

Table S5. Outlet wastewater volumes.

| NSVA            |                                |                 |
|-----------------|--------------------------------|-----------------|
| WWTP            | Volume<br>m <sup>3</sup> /year | Mass<br>kg/year |
| Röstånga        | 10 8040                        | 0.41            |
| Kvidinge        | 12 0815                        | 0.45            |
| Kågeröd         | 33 6895                        | 1.27            |
| Eketorp         | 495 305                        | 1.86            |
| Svalöv          | 535 455                        | 2.01            |
| Ekebro          | 1 111 790                      | 4.18            |
| Torekovs        | 1 182 235                      | 4.45            |
| Nyvångsverket   | 1 334 805                      | 5.02            |
| Lundåkraverket  | 4 581 115                      | 17.22           |
| Öresundsverket  | 23 904 215                     | 89.88           |
| <b>Total</b>    | <b>33 710 670</b>              | <b>126.75</b>   |
| VA SYD          |                                |                 |
| WWTP            | Volume<br>m <sup>3</sup> /year | Mass<br>kg/year |
| Örtofta         | 33 800                         | 0.13            |
| Torna Hällestad | 46 500                         | 0.17            |
| Stockamöllan    | 65 100                         | 0.24            |
| Hurva           | 88 430                         | 0.33            |
| Håstad          | 98 373                         | 0.37            |
| Revinge         | 106 158                        | 0.40            |
| Billinge        | 141 800                        | 0.53            |
| Löberöd         | 152 200                        | 0.57            |
| Flyinge         | 206 000                        | 0.77            |
| Stehag          | 299 756                        | 1.13            |
| Veberöd         | 340 500                        | 1.28            |
| Södra Sandby    | 830 000                        | 3.12            |
| Ellinge         | 4 433 000                      | 16.67           |
| Klagshamn       | 8 305 000                      | 31.23           |
| Källby          | 11 290 000                     | 42.45           |
| Sjölundaverket  | 42 258 000                     | 158.89          |
| <b>Total</b>    | <b>68 694 617</b>              | <b>258.29</b>   |
| VA SYD          |                                |                 |
| WWTP            | Volume<br>m <sup>3</sup> /year | Mass<br>kg/year |
| Örtofta         | 33 800                         | 0.13            |
| Torna Hällestad | 46 500                         | 0.17            |
| Stockamöllan    | 65 100                         | 0.24            |
| Hurva           | 88 430                         | 0.33            |

|                |                   |               |
|----------------|-------------------|---------------|
| Håstad         | 98 373            | 0.37          |
| Revinge        | 106 158           | 0.40          |
| Billinge       | 141 800           | 0.53          |
| Löberöd        | 152 200           | 0.57          |
| Flyinge        | 206 000           | 0.77          |
| Stehag         | 299 756           | 1.13          |
| Veberöd        | 340 500           | 1.28          |
| Södra Sandby   | 830 000           | 3.12          |
| Ellinge        | 4 433 000         | 16.67         |
| Klagshamn      | 8 305 000         | 31.23         |
| Källby         | 11 290 000        | 42.45         |
| Sjölundaverket | 42 258 000        | 158.89        |
| <b>Total</b>   | <b>68 694 617</b> | <b>258.29</b> |

Outlet wastewater volumes and estimated masses in kilograms of 21 pharmaceuticals from various wastewater treatment organisations in Scania.

Table S6. Upstream and downstream concentrations.

| Pharmaceutical | LOQ (ng/L) | Gärds Köpinge<br>Vramsån River |            | Klippan WWTP<br>Bäljane Å River |            | Sankt Olof WWTP<br>Rörums Södra Å River |            | Svedala WWTP<br>Sege Å River |            | Kristianstad WWTP<br>Helge Å River / Hammarsjön Lake |            | Ormanäs WWTP<br>Ringsjön Lake |
|----------------|------------|--------------------------------|------------|---------------------------------|------------|-----------------------------------------|------------|------------------------------|------------|------------------------------------------------------|------------|-------------------------------|
|                |            | Upstream                       | Downstream | Upstream                        | Downstream | Upstream                                | Downstream | Upstream                     | Downstream | Upstream                                             | Downstream | Downstream                    |
| Ciprofloxacin  | 10         | <LOQ                           | <LOQ       | <LOQ                            | <LOQ       | <LOQ                                    | <LOQ       | <LOQ                         | <LOQ       | <LOQ                                                 | <LOQ       | <LOQ                          |
| Citalopram     | 1          | <LOQ                           | <LOQ       | <LOQ                            | 2.8        | <LOQ                                    | 2.0        | <LOQ                         | 6.2        | <LOQ                                                 | 5.1        | <LOQ                          |
| Clarithromycin | 2          | <LOQ                           | <LOQ       | <LOQ                            | 2.0        | <LOQ                                    | <LOQ       | <LOQ                         | 7.1        | <LOQ                                                 | 2.7        | <LOQ                          |
| Diclofenac     | 2          | 4.3                            | 5.0        | 2.3                             | 41         | <LOQ                                    | 25         | <LOQ                         | 57         | 3.6                                                  | 59         | <LOQ                          |
| Erythromycin   | 0.5        | 0.6                            | 0.8        | 1.4                             | 8.8        | <LOQ                                    | <LOQ       | <LOQ                         | 33         | 0.8                                                  | 24         | 0.5                           |
| Estrone        | 0.2        | 0.3                            | 0.4        | 0.2                             | 0.2        | 0.2                                     | 0.3        | 0.2                          | 0.4        | <LOQ                                                 | 0.2        | 0.6                           |
| Fluconazole    | 0.3        | 0.3                            | <LOQ       | 0.6                             | 2.0        | <LOQ                                    | 0.4        | <LOQ                         | 1.4        | 0.6                                                  | 6.1        | 1.2                           |
| Ibuprofen      | 100        | <LOQ                           | <LOQ       | <LOQ                            | <LOQ       | <LOQ                                    | <LOQ       | <LOQ                         | <LOQ       | <LOQ                                                 | <LOQ       | <LOQ                          |
| Carbamazepine  | 0.5        | 1.5                            | 1.8        | 6.7                             | 27         | <LOQ                                    | 25         | <LOQ                         | 38         | 5.9                                                  | 59         | 12                            |
| Ketoconazole   | 15         | <LOQ                           | <LOQ       | <LOQ                            | <LOQ       | <LOQ                                    | <LOQ       | <LOQ                         | <LOQ       | <LOQ                                                 | <LOQ       | <LOQ                          |
| Levonorgestrel | -          | <LOQ                           | <LOQ       | <LOQ                            | <LOQ       | <LOQ                                    | <LOQ       | <LOQ                         | <LOQ       | <LOQ                                                 | <LOQ       | <LOQ                          |
| Losartan       | 1          | 1.2                            | 1.7        | 1.9                             | 12         | <LOQ                                    | 19         | <LOQ                         | 33         | 2.2                                                  | 16         | 1.7                           |
| Metoprolol     | 2          | 4.8                            | 5.7        | 7.7                             | 52         | <LOQ                                    | 34         | <LOQ                         | 73         | 6.0                                                  | 62         | 3.9                           |

|                  |     |      |      |      |      |      |      |      |      |      |      |      |
|------------------|-----|------|------|------|------|------|------|------|------|------|------|------|
| Methotrexate     | 2   | <LOQ |
| Naproxen         | 10  | <LOQ | <LOQ | <LOQ | 13   | <LOQ | 57   | 3.2  | 12   | <LOQ | <LOQ | <LOQ |
| Oxazepam         | 1   | 3.4  | 3.7  | 5.6  | 23   | <LOQ | 17   | <LOQ | 18   | 3.8  | 56   | 4.7  |
| Sertraline       | 1   | <LOQ | 1.6  | <LOQ | <LOQ | <LOQ |
| Sulfamethoxazole | 2   | <LOQ | <LOQ | 4.0  | 11   | <LOQ | <LOQ | <LOQ | 11   | 1.9  | 34   | 3.4  |
| Tramadol         | 10  | <LOQ | <LOQ | <LOQ | 11   | <LOQ | <LOQ | <LOQ | 8.8  | <LOQ | 26   | <LOQ |
| Trimethoprim     | 1   | <LOQ | <LOQ | <LOQ | 3.3  | 1.7  | 1.3  | <LOQ | 5.4  | 0.9  | 2.3  | <LOQ |
| Zolpidem         | 0.5 | <LOQ |

Concentrations upstream and downstream WWTPs in ng/L of 21 pharmaceuticals in Scanian recipients. **ORANGE** cells indicate antibiotics.
